# Supplementary material for: Evaluation of Differences in Temporal Synchrony Between Brain Regions in Individuals With Autism and Typical Development
Source: PubMed Central journal article supplement (PMC6324391; doi:10.1001/jamanetworkopen.2018.4777), 2018-11-16
Supplement: jamanetwopen-1-e184777-s001.pdf [file jamanetwopen-1-e184777-s001.pdf]

## Supplementary Online Content

King JB, Prigge MBD, King CK, et al. Evaluation of differences in temporal synchrony between brain regions in individuals with autism and typical development. *JAMA Netw Open*. 2018;1(7):e184777. doi:10.1001/jamanetworkopen.2018.4777

**eTable.** List of Research Sites Included in the ABIDE Dataset

**eFigure 1.** Aberrant Functional Connectivity in Individuals With Autism

**eFigure 2.** Sustained Connectivity is Positively Associated With Autistic Traits

**eFigure 3.** Sustained Connectivity is Negatively Associated With Trail Making Completion Time

This supplementary material has been provided by the authors to give readers additional information about their work.

**eTable.** List of Research Sites Included in the ABIDE Dataset

| <b>ABIDE I Sites</b>  |                                                                                |
|-----------------------|--------------------------------------------------------------------------------|
| KKI                   | Kennedy Krieger Institute                                                      |
| Leuven                | University of Leuven                                                           |
| MaxMun                | Ludwig Maximilian University of Munich                                         |
| NYU                   | New York University Langone Medical Center                                     |
| Pitt                  | University of Pittsburgh School of Medicine                                    |
| SDSU                  | San Diego State University                                                     |
| Trinity               | Trinity Centre for Health Sciences                                             |
| UCLA                  | University of California Los Angeles                                           |
| UM                    | University of Michigan                                                         |
| USM                   | University of Utah School of Medicine                                          |
| Yale                  | Yale Child Study Center                                                        |
| <b>ABIDE II Sites</b> |                                                                                |
| EMC                   | Eramus University Medical Center                                               |
| GU                    | Georgetown University                                                          |
| IP                    | Institut Pasteur and Robert Debré Hospital                                     |
| IU                    | Indiana University                                                             |
| KKI                   | Kennedy Krieger Institute                                                      |
| NYU                   | New York University Langone Medical Center                                     |
| OHSU                  | Oregon Health and Science University                                           |
| ONRC                  | Olin Neuropsychiatry Research Center, Institute of Living at Hartford Hospital |
| SDSU                  | San Diego State University                                                     |
| Stanford              | Stanford University                                                            |
| TCD                   | Trinity Centre for Health Sciences                                             |
| UCD                   | University of California Davis                                                 |
| UCLA                  | University of California Los Angeles                                           |
| USM                   | University of Utah School of Medicine                                          |

**eFigure 1.** Aberrant Functional Connectivity in Individuals With Autism

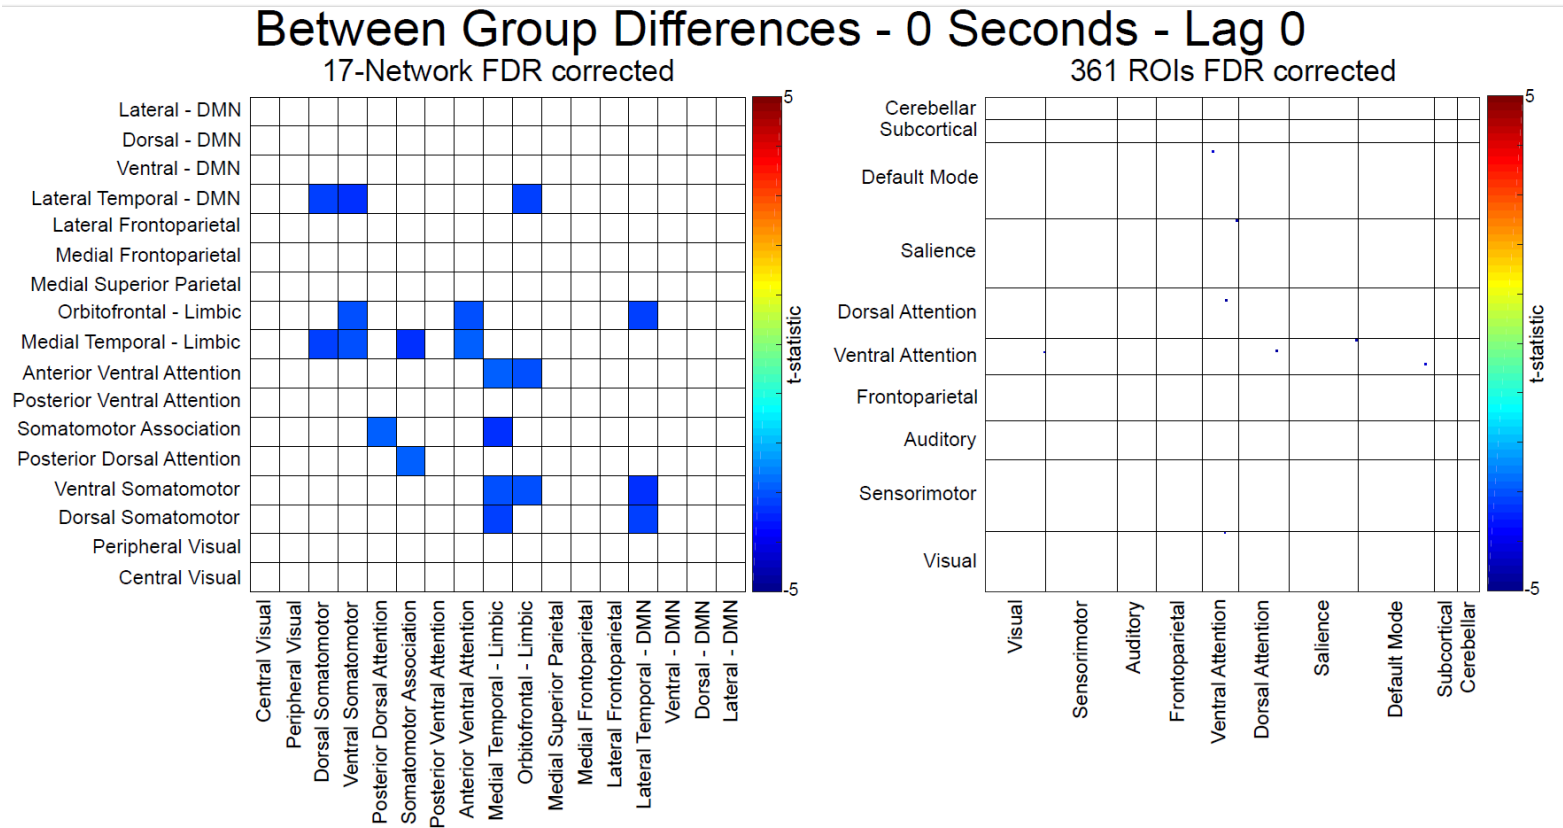

Distribution of decreased functional connectivity in individuals with autism relative to controls at zero lag across a 17-network parcellation (false discovery rate correction,  $q[\text{FDR}] < .05$ ) and across 361 gray matter regions of interest (ROI) ( $q[\text{FDR}] < .05$ ).

**eFigure 2.** Sustained Connectivity is Positively Associated With Autistic Traits

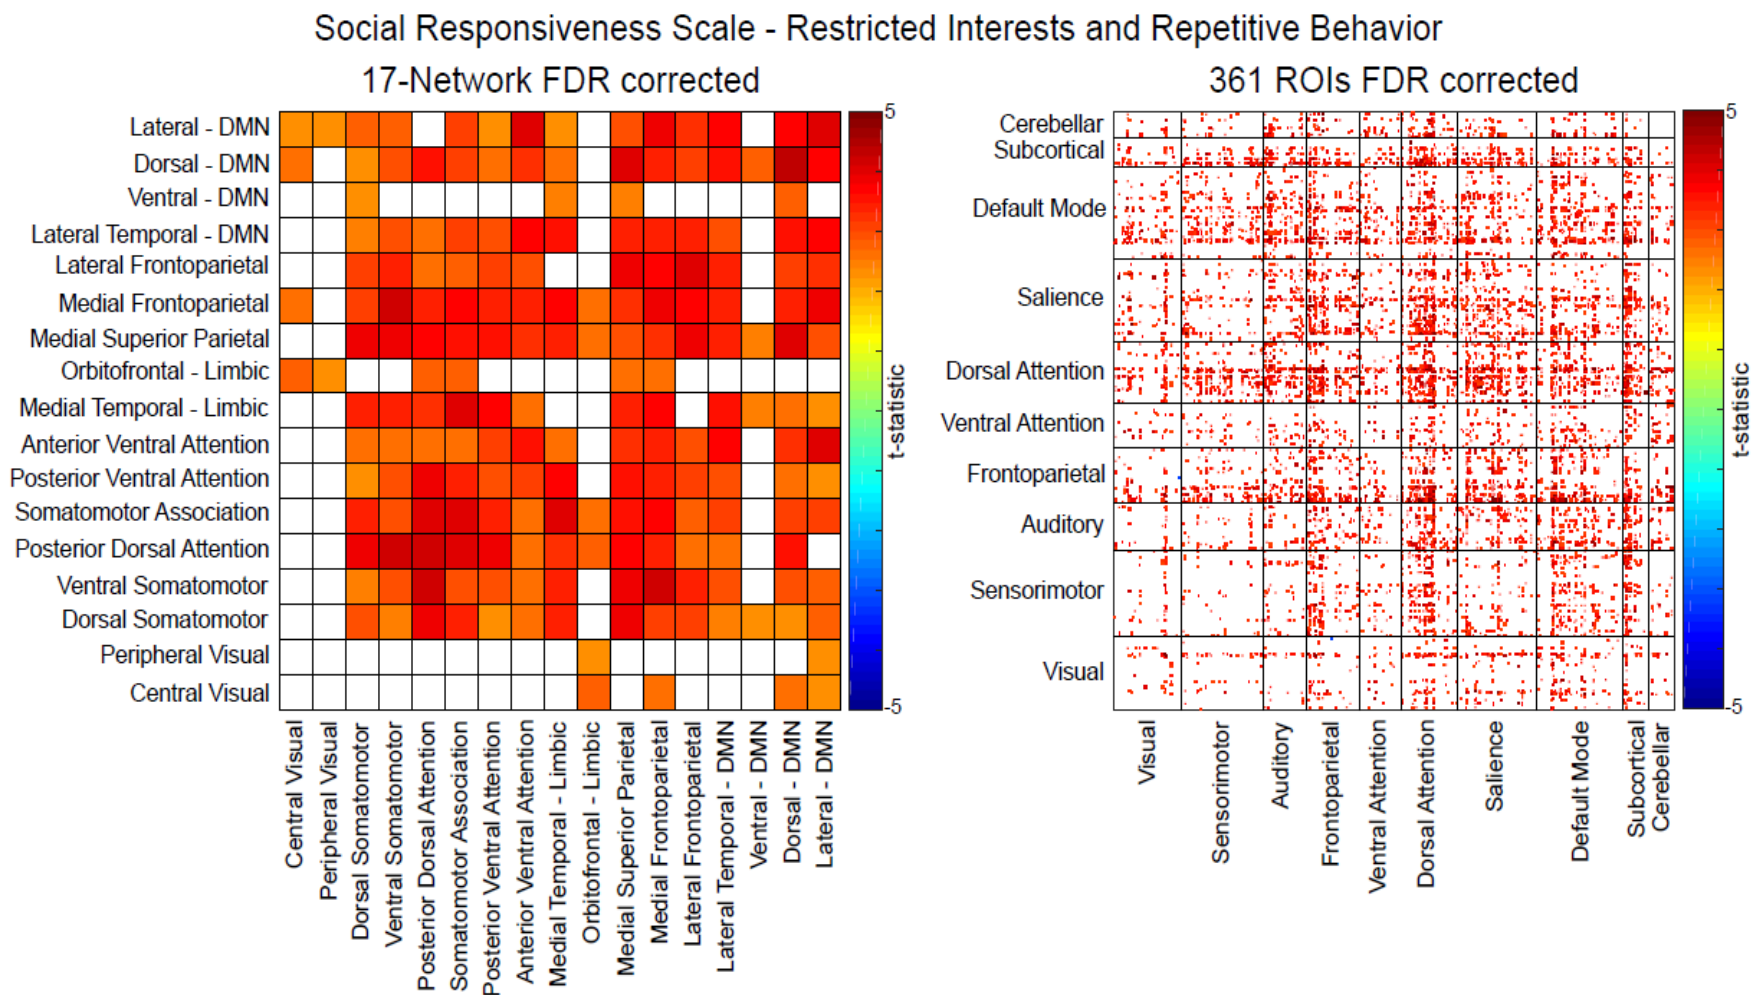

## Social Responsiveness Scale - Social Communication and Interaction

17-Network FDR corrected

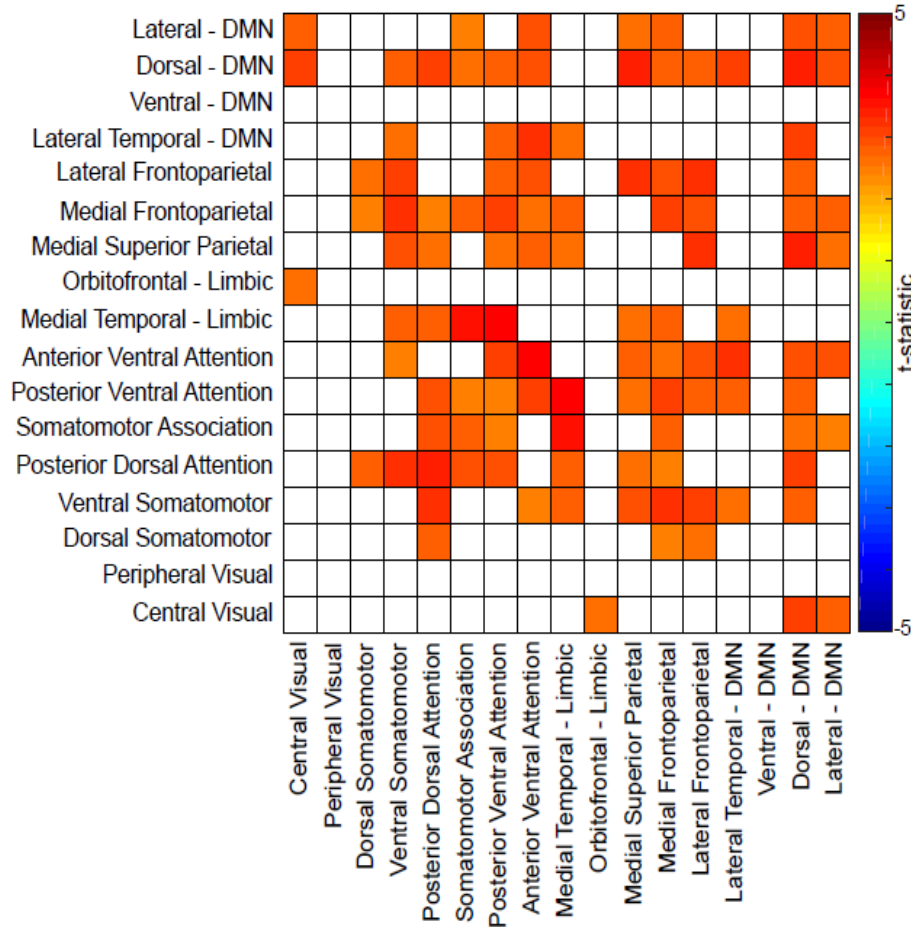

361 ROIs FDR corrected

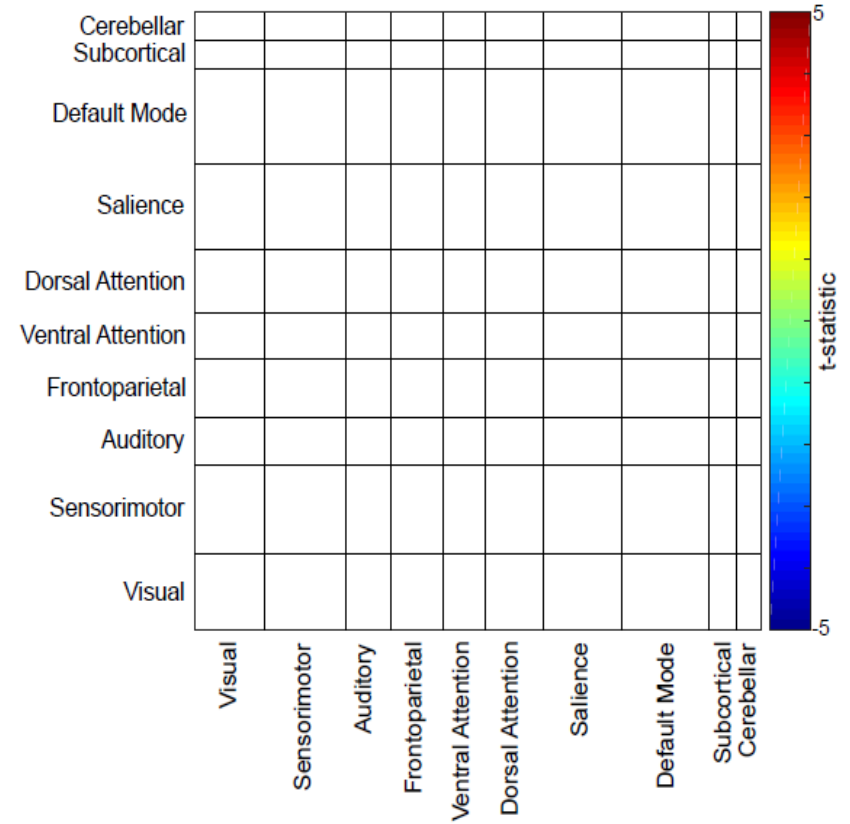

## Social Responsiveness Scale - Total Score

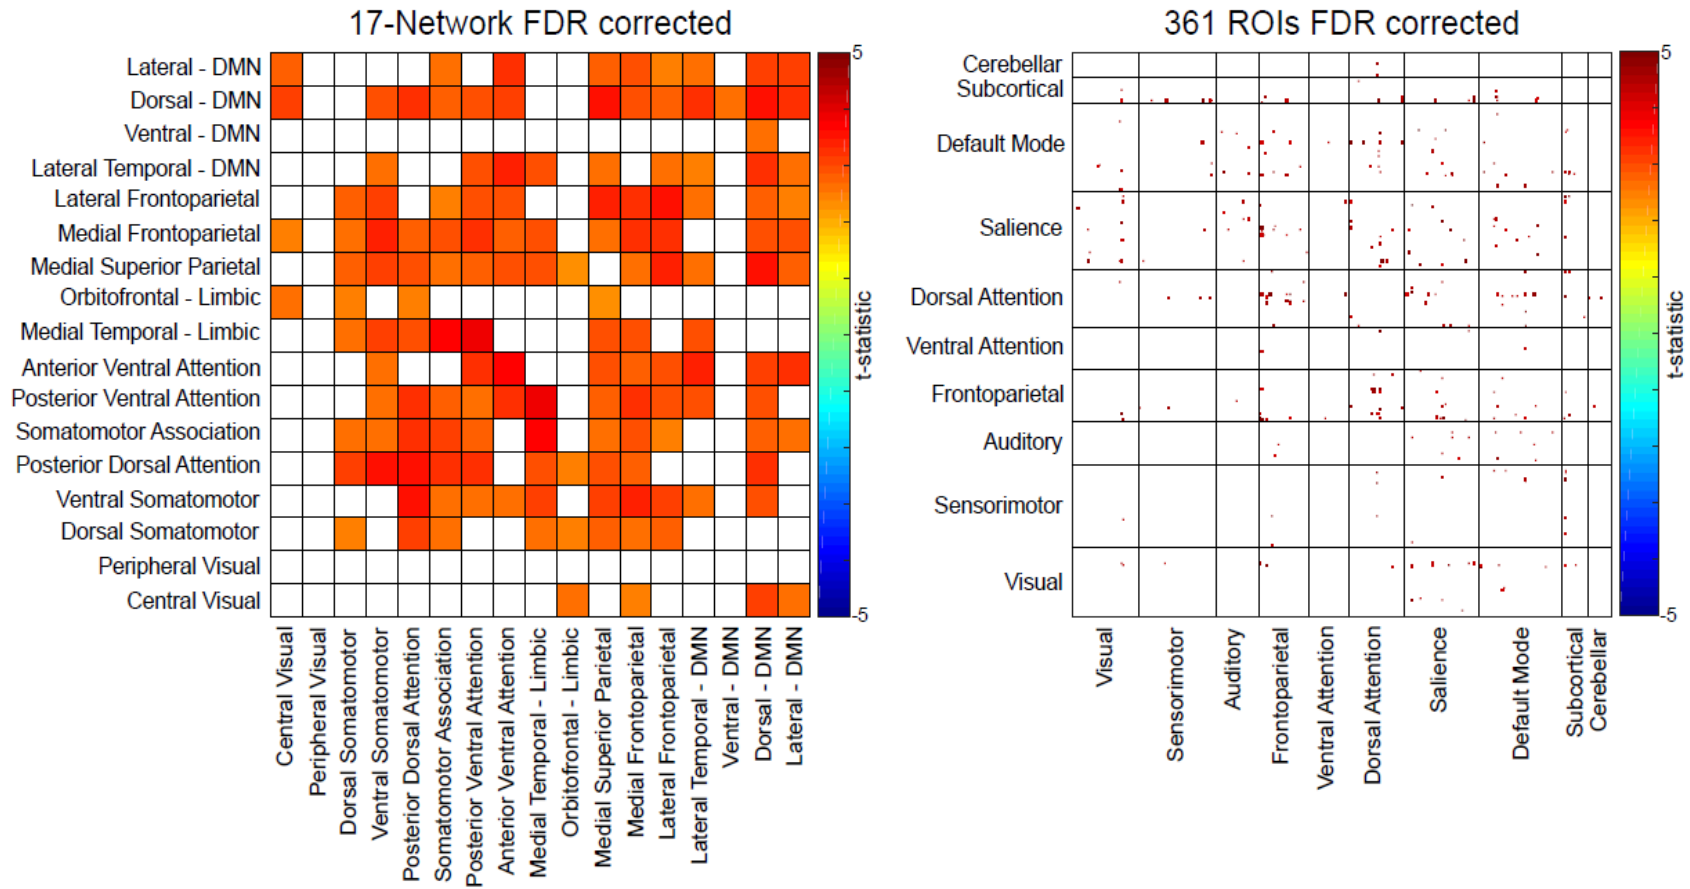

A significant ( $q[FDR] < .05$ ) relationship was found between Social Responsiveness Scale scores and autistic traits in individuals with autism across a 17-network parcellation and across 361 gray matter regions of interest (ROI). DMN = Default Mode Network.

**eFigure 3.** Sustained Connectivity is Negatively Associated With Trail Making Completion Time

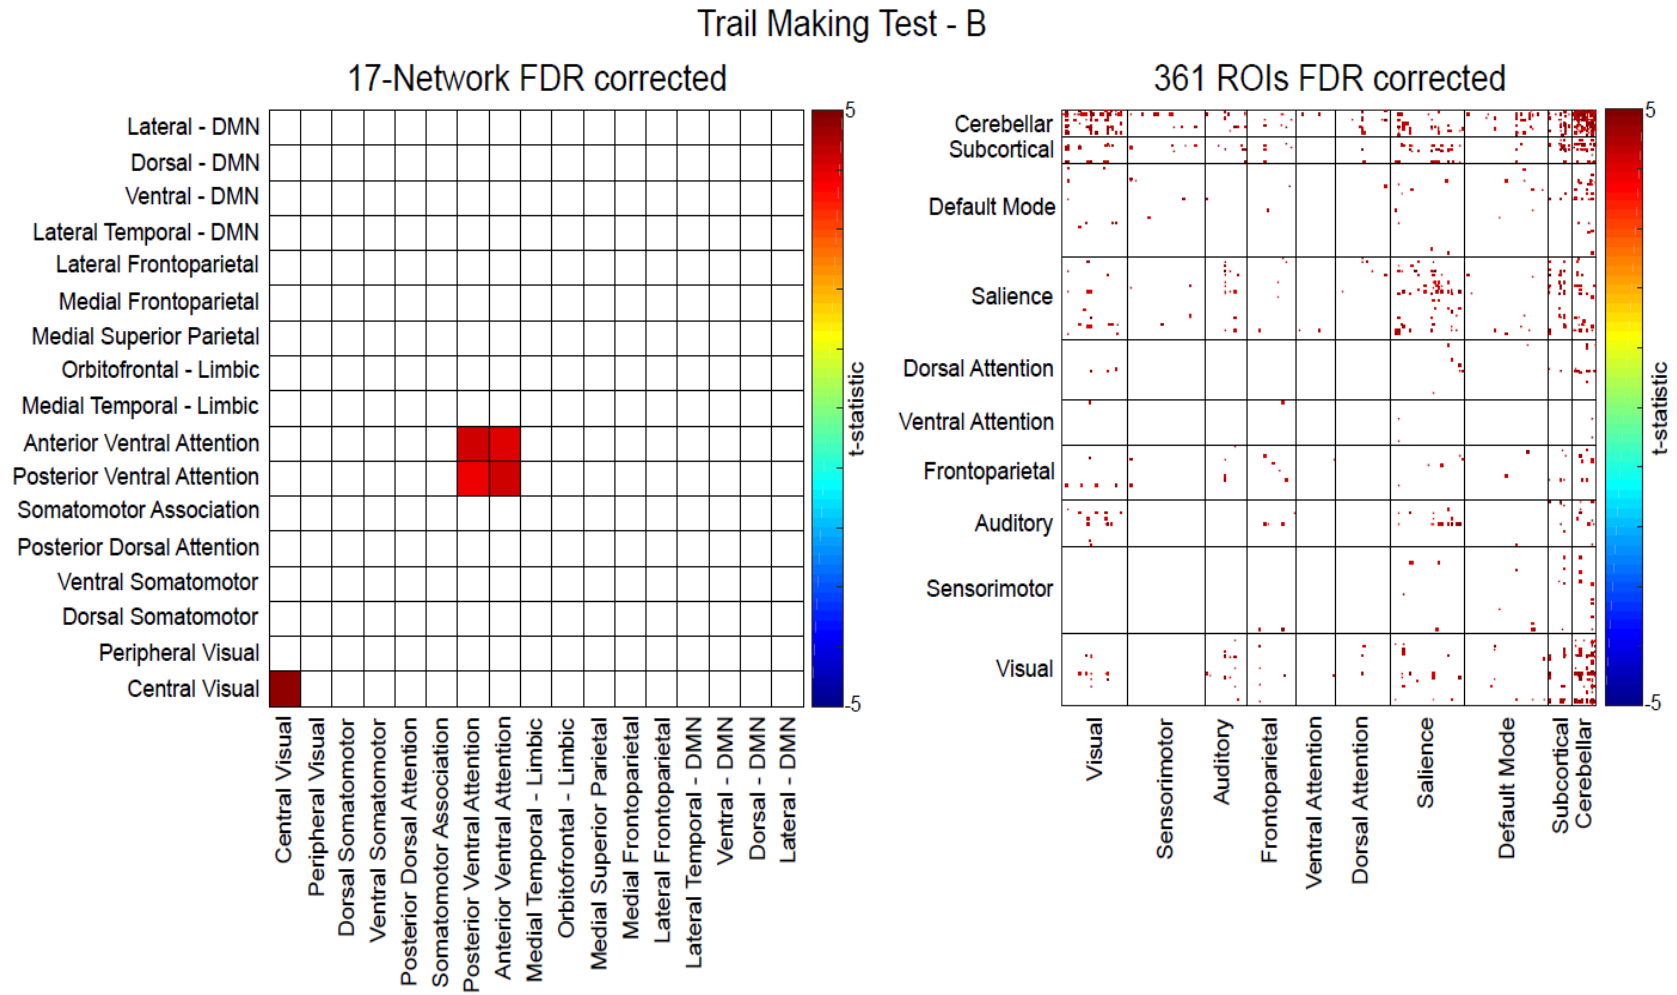

# Trail Making Test - B-A

## 17-Network FDR corrected

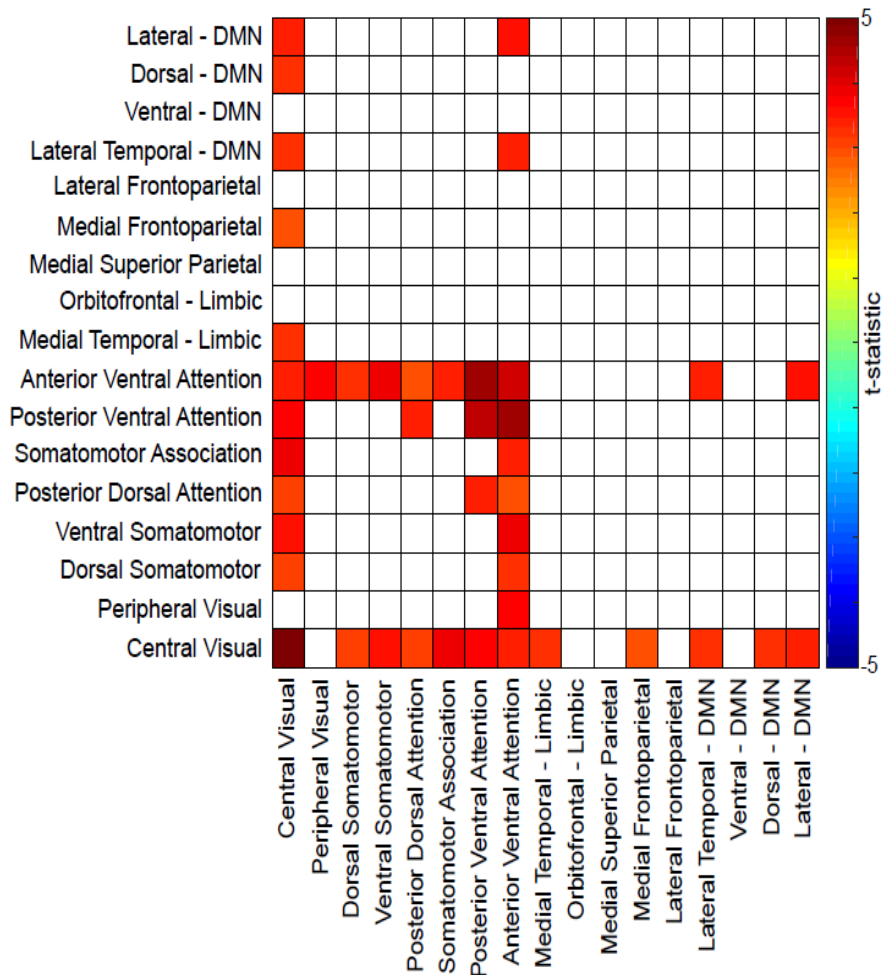

## 361 ROIs FDR corrected

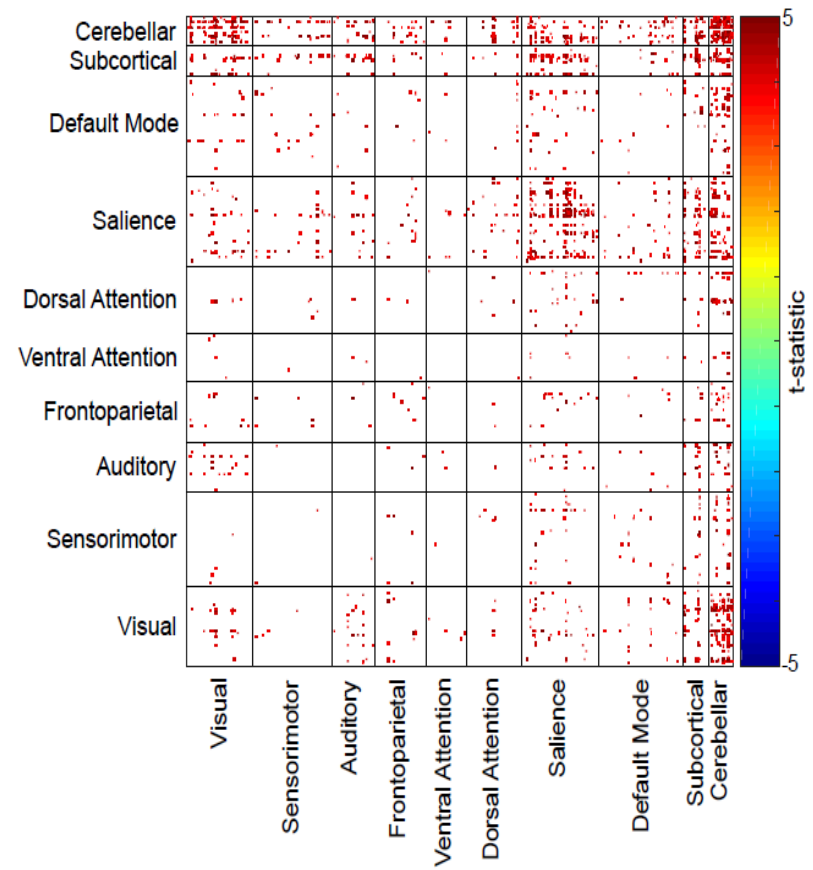



In typically developing individuals, Trail Making Test Part B and Part B minus A completion times, a measure of processing speed where higher times indicate poorer processing speeds, were positively associated with sustained connectivity across a 17-network parcellation ( $q[\text{FDR}] < .05$ ) and across 361 gray matter regions of interest (ROI) with false discovery rate  $q[\text{FDR}] < .05$  suggesting an inverse relationship between processing speed and sustained connectivity. DMN = Default Mode Network.
